# Supplementary material for: Promotion of methane storage capacity with metal–organic frameworks of high porosity
Source: Royal Society of Chemistry journal article supplement (doi:10.1039/d2qi02255a), 2022-11-24
Supplement: d2qi02255a1.pdf [file d2qi02255a1.pdf]

## Supporting information

### Promotion of methane storage capacity with metal-organic frameworks of high porosity

Xin Zhang,<sup>a,b</sup> Rui-Biao Lin,<sup>b</sup> Zeid A. Alothman,<sup>c</sup> Osamah Alduhaish,<sup>c</sup> Taner Yildirim,<sup>d</sup> Wei Zhou,<sup>d</sup> Jian-Rong Li,<sup>\*a</sup> and Banglin Chen<sup>\*b</sup>

- Beijing Key Laboratory for Green Catalysis and Separation and Department of Environmental Chemical Engineering, Faculty of Environment and Life, Beijing University of Technology, Beijing 100124, P. R. China. E-mail: jrli@bjut.edu.cn.
- Department of Chemistry, University of Texas at San Antonio, One UTSA Circle, San Antonio, Texas 78249-0698, USA, E-mail: [banglin.chen@utsa.edu](mailto:banglin.chen@utsa.edu)
- Chemistry Department, College of Science, King Saud University, Riyadh 11451, Saudi Arabia.
- NIST Center for Neutron Research, Gaithersburg, Maryland 20899-6102, USA.

#### Additional figures and tables

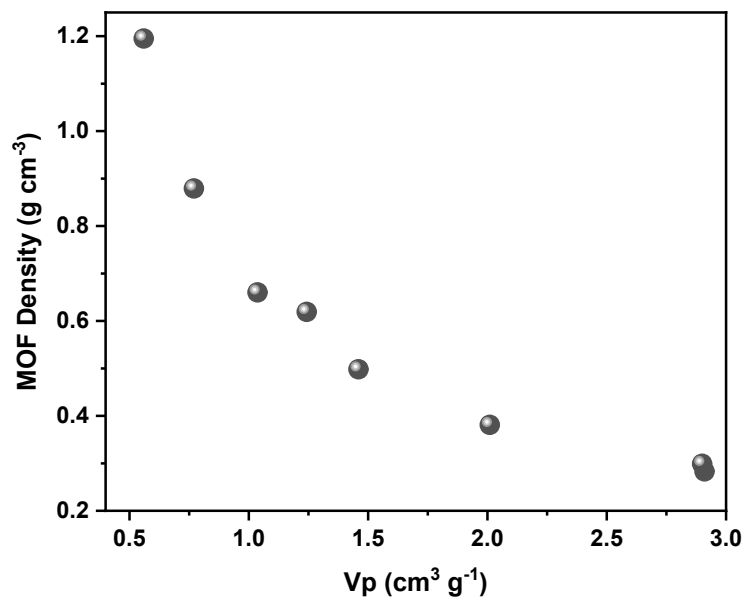

Figure S1. MOF density vs pore volume.

**Table S1.** Total adsorption and working capacity at 298 K and 273 K of MOFs discussed

| MOF        | Crystal density   | Pore volume | Total adsorption 100 bar 298 K |                                  | Total adsorption 100 bar 270 K |                                  | Working capacity 5-100 bar 298 K |                                  | Working capacity 5-100 bar 270 K |                                  | Qst  | Ref.      |
|------------|-------------------|-------------|--------------------------------|----------------------------------|--------------------------------|----------------------------------|----------------------------------|----------------------------------|----------------------------------|----------------------------------|------|-----------|
|            | g/cm <sup>3</sup> |             | cm <sup>3</sup> /g             | cm <sup>3</sup> cm <sup>-3</sup> | g g <sup>-1</sup>              | cm <sup>3</sup> cm <sup>-3</sup> | g g <sup>-1</sup>                | cm <sup>3</sup> cm <sup>-3</sup> | g g <sup>-1</sup>                | cm <sup>3</sup> cm <sup>-3</sup> |      |           |
| Ni-MOF-74  | 1.195             | 0.56        | 281                            | 0.17                             | 293                            | 0.18                             | 162                              | 0.1                              | 135                              | 0.08                             | 21.4 | 1         |
| HKUST-1    | 0.881             | 0.77        | 277                            | 0.23                             | 306                            | 0.25                             | 207                              | 0.17                             | 195                              | 0.16                             | 17   | 1         |
| ZJU-105a   | 0.66              | 1.037       | 258                            | 0.28                             | 287                            | 0.31                             | 203                              | 0.22                             | 207                              | 0.22                             | 14.2 | 2         |
| PCN-46a    | 0.619             | 1.243       | 260                            | 0.30                             | 299                            | 0.35                             | 217                              | 0.25                             | 235                              | 0.27                             | 16.6 | 2         |
| NU-1500-Al | 0.498             | 1.46        | 237                            | 0.34                             | 273                            | 0.39                             | 202                              | 0.29                             | 224                              | 0.32                             | 13.7 | 3         |
| MFU-4l-Li  | 0.479             | 1.66        | 248                            | 0.37                             | 294                            | 0.44                             | 220                              | 0.30                             | 251                              | 0.38                             | 13.3 | 4         |
| BUT-20     | 0.381             | 2.01        | 224                            | 0.42                             | 260                            | 0.49                             | 197                              | 0.37                             | 224                              | 0.42                             | 12   | 5         |
| NPF-200    | 0.389             | 2.17        | 227                            | 0.42                             | 275                            | 0.51                             | 207                              | 0.38                             | 248                              | 0.46                             | 10.7 | This work |
| NU-1501-Fe | 0.299             | 2.9         | 218                            | 0.52                             | 264                            | 0.63                             | 201                              | 0.48                             | 239                              | 0.57                             | 9.6  | 3         |
| NU-1501-Al | 0.283             | 2.91        | 214                            | 0.54                             | 262                            | 0.66                             | 198                              | 0.5                              | 238                              | 0.60                             | 9.7  | 3         |



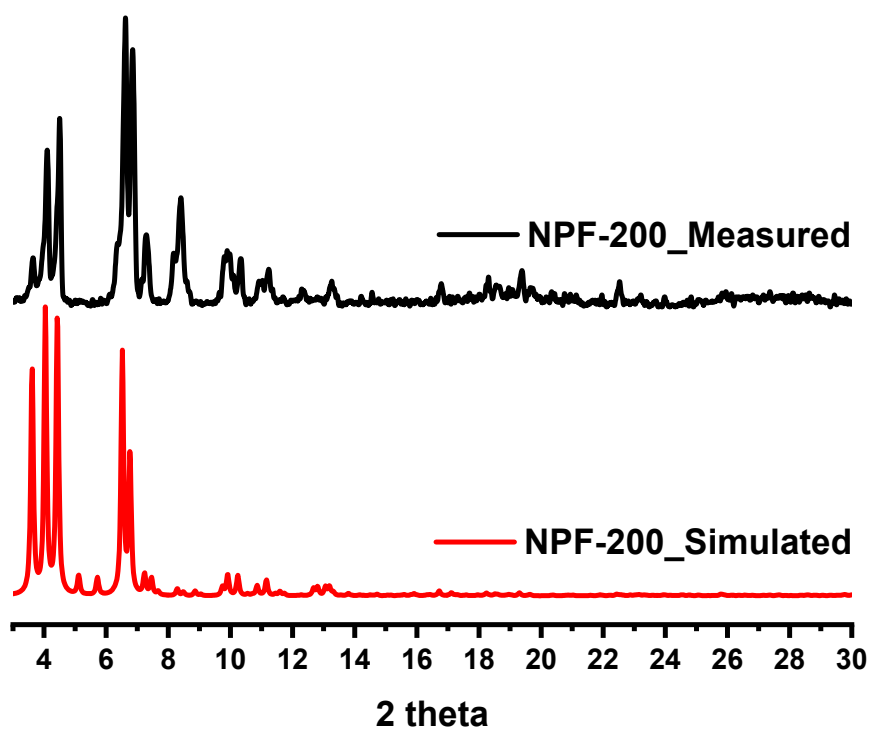

Figure S2. PXRD of NPF-200 and comparison with that simulated from single crystal structure.

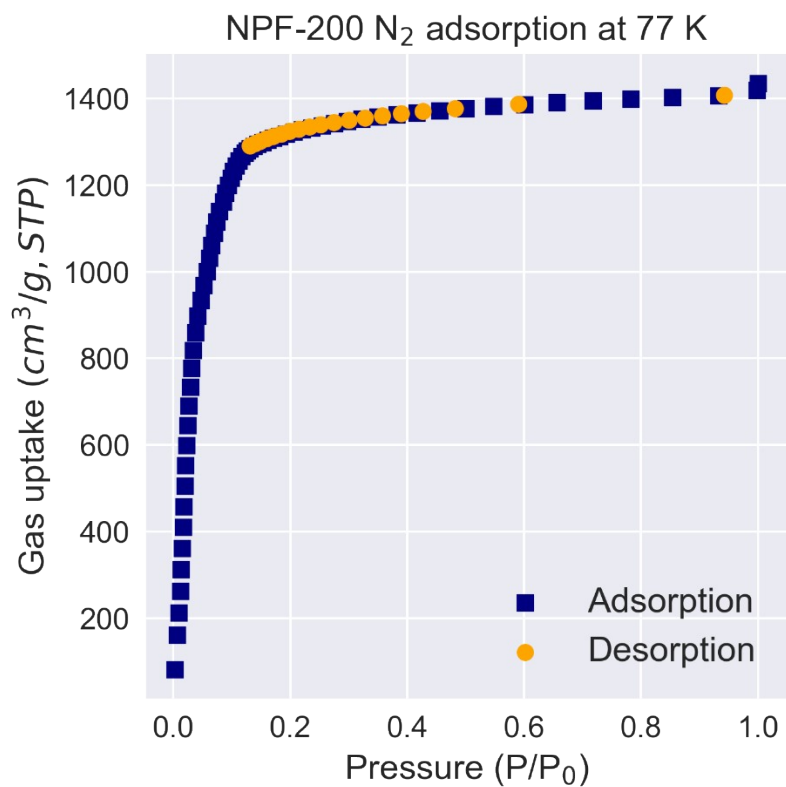

Figure S3.  $N_2$  adsorption isotherm of NPF-200 at 77 K.

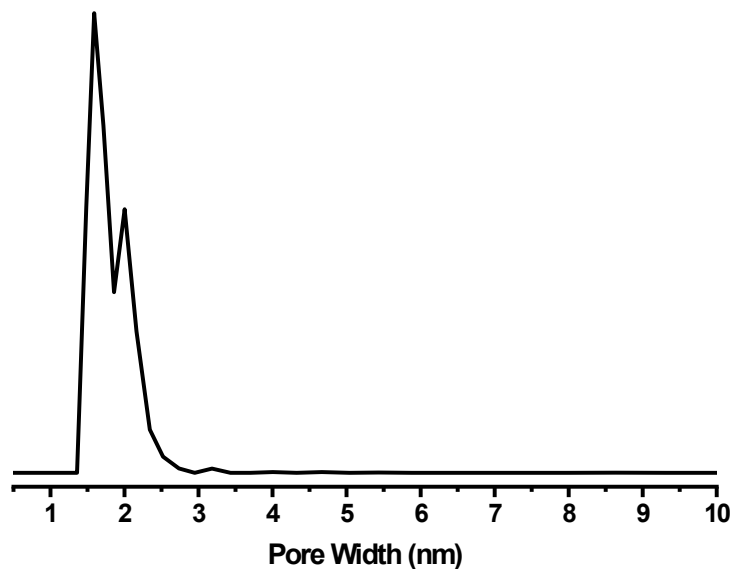

**Figure S4.** Pore size distribution determined from N<sub>2</sub> uptake at 77 K.

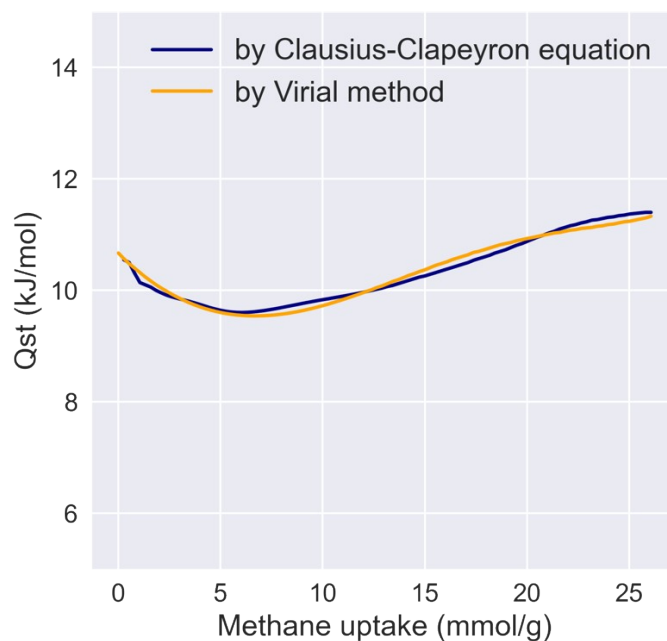

**Figure S5.** Qst of methane adsorption in NPF-200 calculated using virial method.

Disclaimer: Certain commercial suppliers are identified in this paper to foster understanding. Such identification does not imply recommendation or endorsement by the National Institute of Standards and Technology, nor does it imply that the materials or equipment identified are necessarily the best available for the purpose.

## References

1. J. A. Mason, M. Veenstra and J. R. Long, Evaluating metal–organic frameworks for natural gas storage, *Chem. Sci.*, 2014, **5**, 32-51.
2. K. Shao, J. Pei, J. X. Wang, Y. Yang, Y. Cui, W. Zhou, T. Yildirim, B. Li, B. Chen and G. Qian, Tailoring the pore geometry and chemistry in microporous metal-organic frameworks for high methane storage working capacity, *Chem. Commun.*, 2019, **55**, 11402-11405.
3. Z. Chen, P. Li, R. Anderson, X. Wang, X. Zhang, L. Robison, L. R. Redfern, S. Moribe, T. Islamoglu, D. A. Gomez-Gualdron, T. Yildirim, J. F. Stoddart and O. K. Farha, Balancing volumetric and gravimetric uptake in highly porous materials for clean energy, *Science*, 2020, **368**, 297-303.
4. Z. Chen, M. R. Mian, S. J. Lee, H. Chen, X. Zhang, K. O. Kirlikovali, S. Shulda, P. Melix, A. S. Rosen, P. A. Parilla, T. Gennett, R. Q. Snurr, T. Islamoglu, T. Yildirim and O. K. Farha, Fine-Tuning a Robust Metal-Organic Framework toward Enhanced Clean Energy Gas Storage, *J. Am. Chem. Soc.*, 2021, **143**, 18838-18843.
5. B. Wang, X. Zhang, H. Huang, Z. Zhang, T. Yildirim, W. Zhou, S. Xiang and B. Chen, A microporous aluminum-based metal-organic framework for high methane, hydrogen, and carbon dioxide storage, *Nano Res.*, 2020, **14**, 507-511.
